# Supplementary material
Source: ML conference proceedings conference paper supplement (https://proceedings.neurips.cc/paper_files/paper/2019/hash/00ac8ed3b4327bdd4ebbebcb2ba10a00-Abstract.html)
Supplement: Supplementary file [file 00ac8ed3b4327bdd4ebbebcb2ba10a00-Supplemental.zip]

---

# Supplementary Material for Learning to Propagate for Graph Meta-Learning

---

Paper ID: 610

## 1 Visualization Results

### 1.1 Prototype Hierarchy

We show more visualizations for the hierarchy structure of the training prototypes in Figure. 1.

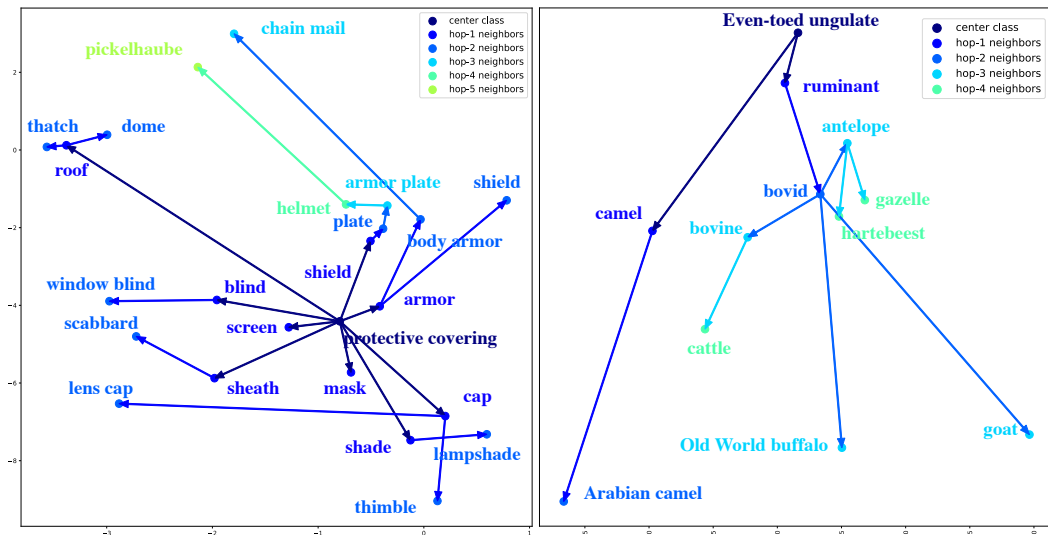

Figure 1: Visualization of the hierarchy structure of subgraphs from the training class prototypes transformed by t-SNE.

### 1.2 Prototypes Before and After Propagation

We show more visualization examples for the comparison of the prototypes learned before (Prototypical Networks) and after propagation (GPN) in Figure. 2.

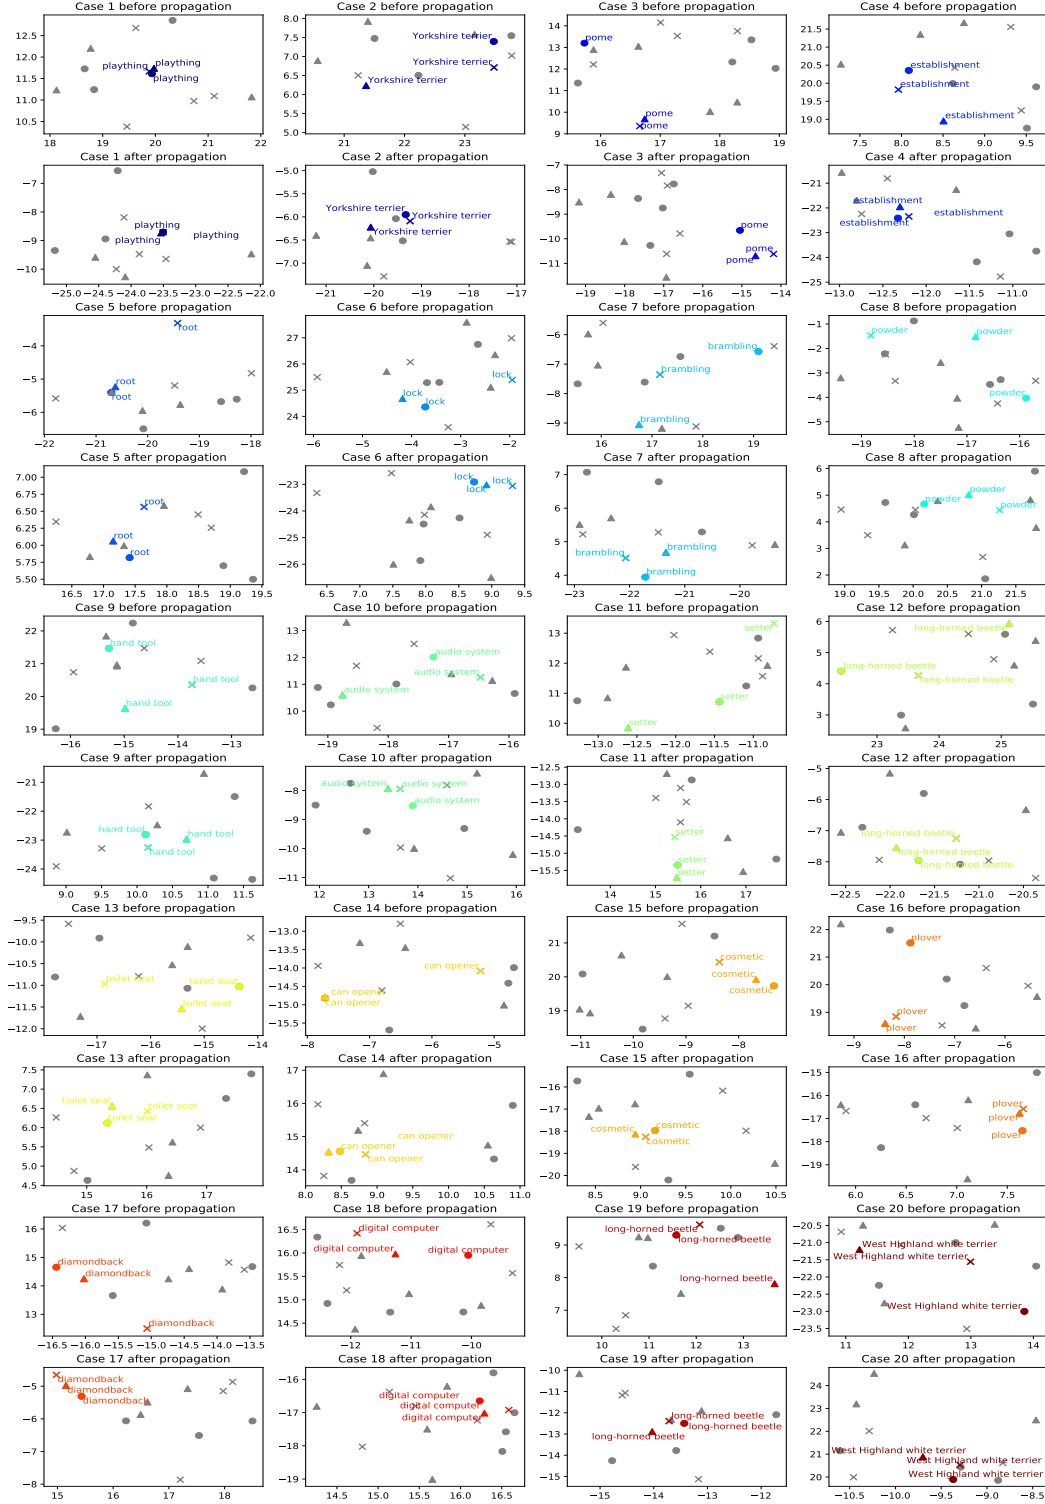

Figure 2: Prototypes before and after GPN propagation on *tieredImageNet-Close* by random sampling for 5-way-1-shot few-shot learning. The prototypes in top row equal to the ones achieved by prototypical network. Different tasks are marked by a different shape ( $\circ/\times/\triangle$ ), and classes shared by different tasks are highlighted by non-grey colors. It shows that GPN is capable to map the prototypes of the same class in different tasks to the same region. Comparing to the result of prototypical network, GPN is more powerful in relating different tasks.
